# Supplementary material for: The soft explosive model of placental mammal evolution
Source: PubMed Central journal article supplement (PMC6029115; doi:10.1186/s12862-018-1218-x), 2018-07-03
Supplement: 12862_2018_1218_MOESM5_ESM.pdf [file 12862_2018_1218_MOESM5_ESM.pdf]

*Additional File 5: Fossil record species richness for Eutheria and Mammalia from Albian through to Lutetian*

**The soft explosive model of placental mammal evolution**

Matthew J. Phillips\*<sup>1</sup> and Carmelo Fruciano<sup>1</sup>

<sup>1</sup>School of Earth, Environmental and Biological Sciences, Queensland University of Technology, Brisbane, Australia

\*Corresponding author: E-mail: m9.phillips@qut.edu.au

**Contents**

Table S4..... 1

**Table S4.** Fossil record species richness for Eutheria and Mammalia from Albian through to Lutetian. From The Paleobiology Database, accessed 29 March, 2017.

| Stages                 | Interval<br>(Ma) | New<br>eutherian<br>species | New<br>mammal<br>species | Standing<br>eutherian<br>species<br>richness | Eutherian<br>species<br>diversificat-<br>ion rate <sup>a</sup> | Eutheria/<br>Mammalia<br>new species<br>appearances |
|------------------------|------------------|-----------------------------|--------------------------|----------------------------------------------|----------------------------------------------------------------|-----------------------------------------------------|
| Albian-<br>Cenomanian  | 113.0-93.9       | 11                          | 91                       | 13                                           | 0.144 <sup>b</sup>                                             | 0.121                                               |
| Turonian-<br>Santonian | 93.9-83.6        | 22                          | 64                       | 25                                           | 0.164                                                          | 0.344                                               |
| Campanian              | 83.6-72.1        | 32                          | 135                      | 38                                           | 0.111                                                          | 0.237                                               |
| Maastrichtian          | 72.1-66.0        | 30                          | 94                       | 43                                           | 0.129                                                          | 0.319                                               |
| Paleocene              | 66.0-56.0        | 778                         | 925                      | 940                                          | 1.809                                                          | 0.841                                               |
| Ypresian               | 56.0-47.8        | 1118                        | 1215                     | 1258                                         | 0.144                                                          | 0.920                                               |
| Lutetian               | 47.8-41.2        | 914                         | 996                      | 1156                                         | 0.110                                                          | 0.918                                               |

<sup>a</sup>New appearances per Ma, per standing eutherian diversity in the *previous* time bin.

<sup>b</sup>Eutherian standing species richness from the previous time bin, Aptian-Barremian is four.
